# Supplementary material
Source: Springer Nature journal article supplement (https://www.springermedizin.de/resource/supplementary/12873_2004_10_MOESM2_ESM.pdf/9431786)

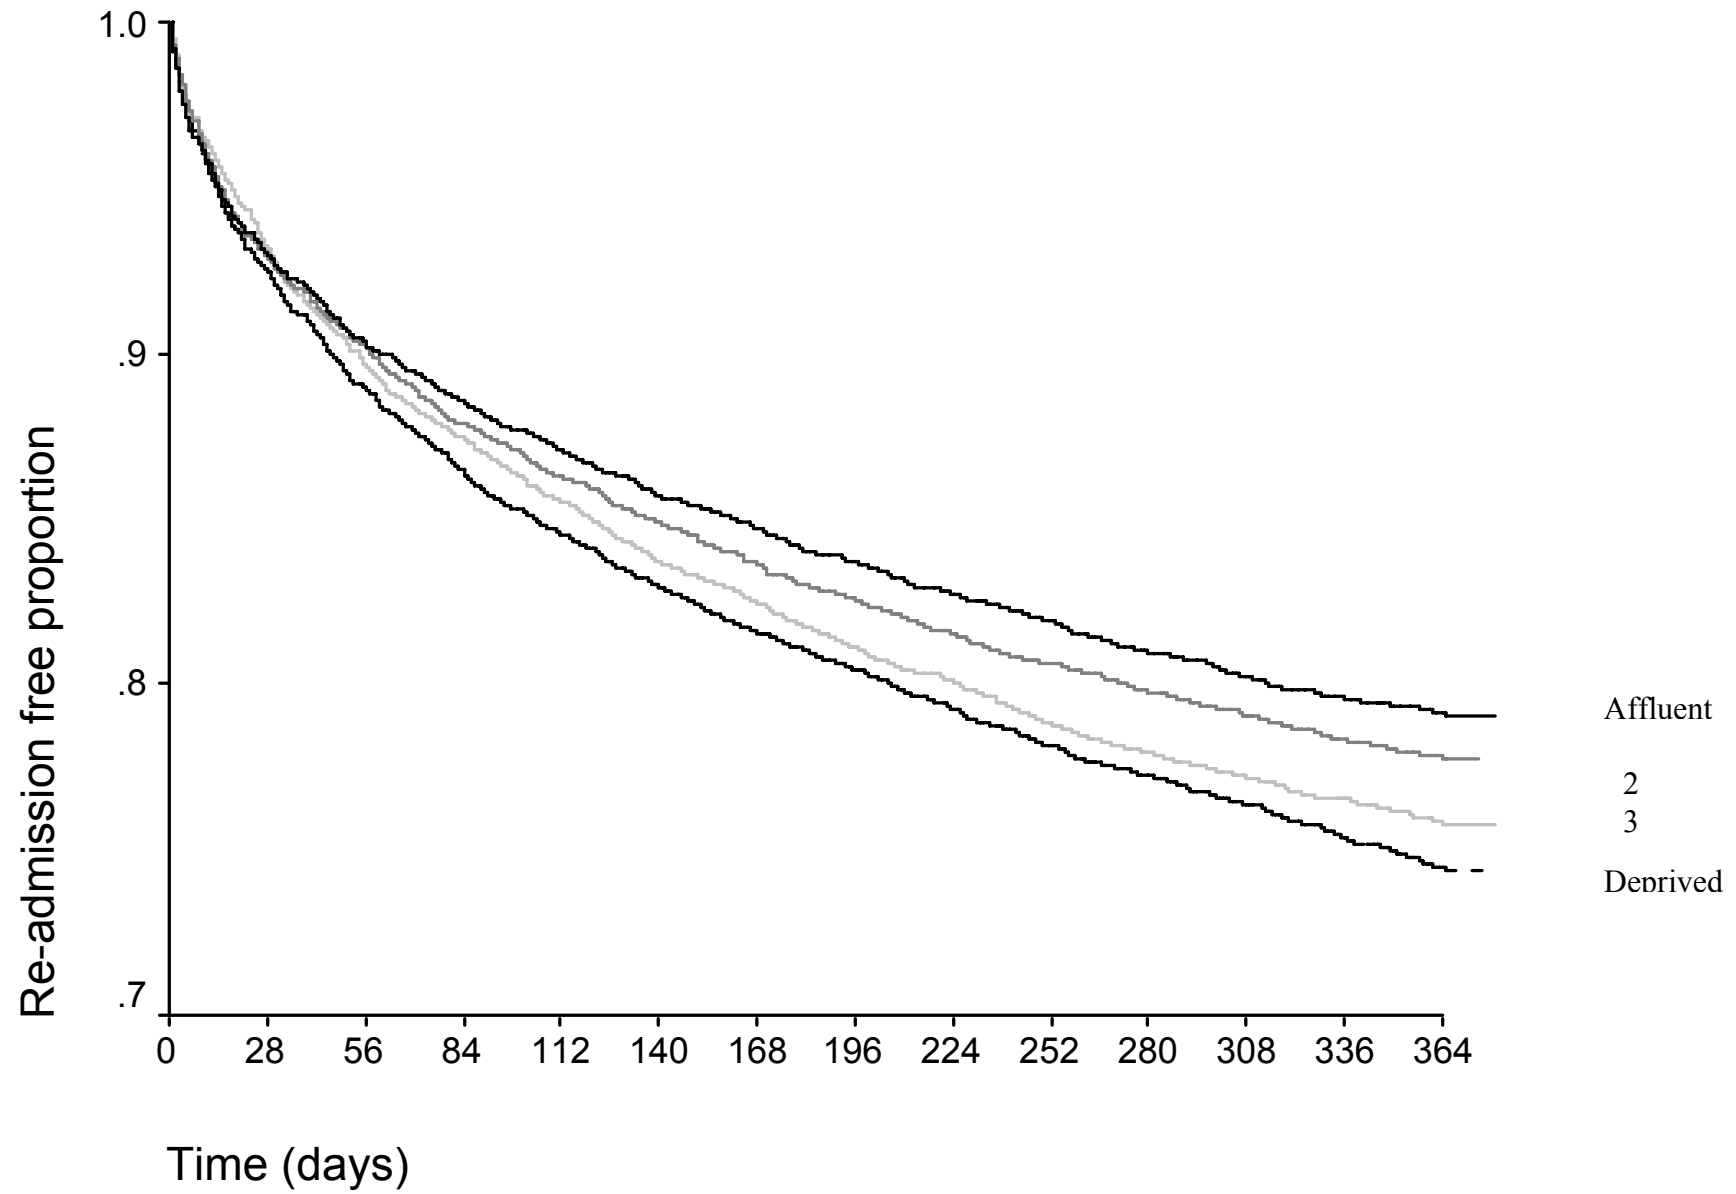

Supplement: MOESM2 [file 9431786]
